# Supplementary material for: An ent-Kaurane-Type Diterpene in Croton antisyphiliticus Mart
Source: MDPI journal article supplement (doi:10.3390/molecules17088851), 2012-07-25

# Support Information

Figure 1. GC chromatogram of compound 1.

## Sample Information

Analyzed by : Admin  
Analyzed : 29/5/2012 02:04:34  
Sample Type : Unknown  
Level # : 1  
  
IS Amount : [1]=1.000  
Sample Amount : 1.000  
Dilution Factor : 1.000  
Vial # : 18  
Injection Volume : 1.000  
Data File : C:\Amostras GCMS\Silvia Taleb\Croton NO.qgd  
  
Method File : C:\Amostras GCMS\Silvia Taleb\Triterpeno DB5.qgm  
Org Method File : C:\Amostras GCMS\Silvia Taleb\Triterpeno DB5.qgm  
Report File :  
Tuning File : C:\GCMSsolution\System\Tune1\24-05-2012.qgt  
Modified by : Admin  
Modified : 29/5/2012 08:44:24

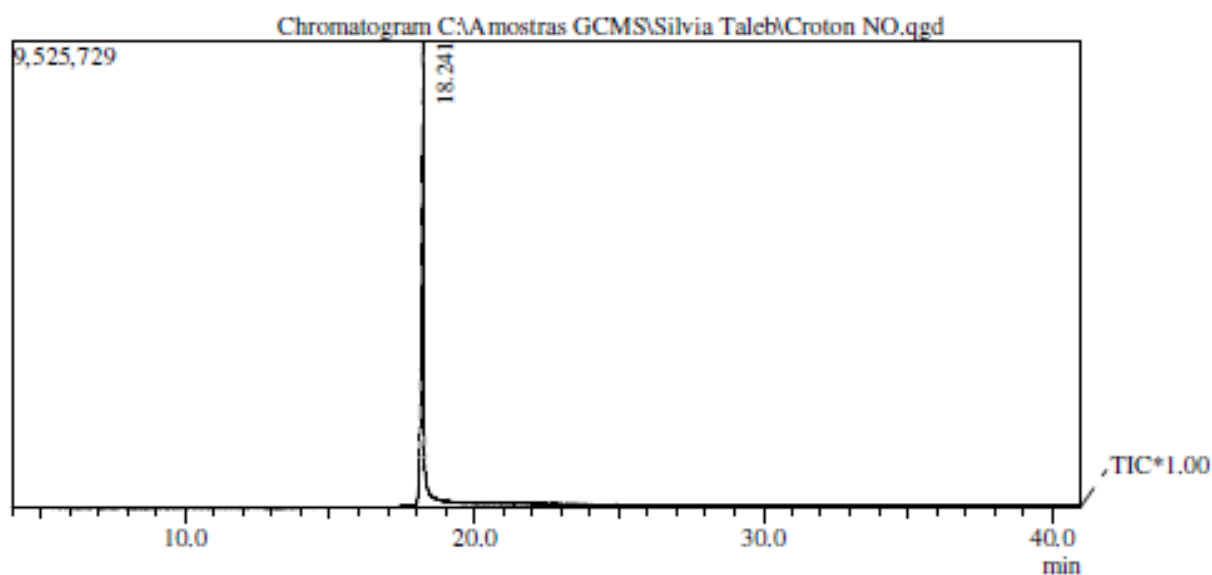

| Peak Report TIC |        |          |        |      |          |
|-----------------|--------|----------|--------|------|----------|
| Peak#           | R.Time | Area     | Area%  | Name | Base m/z |
| 1               | 18.241 | 50730346 | 100.00 |      | 259.15   |
|                 |        | 50730346 | 100.00 |      |          |

Figure 2. EI-MS spectrum of compound 1.

Library

<< Target >>

Line#: 1 R.Time: 18.240(Scan#: 2849) MassPeaks: 228  
 RawMode: Averaged 18.235-18.245(2848-2850) BasePeak: 259.15(442988)  
 BG Mode: Calc. from Peak

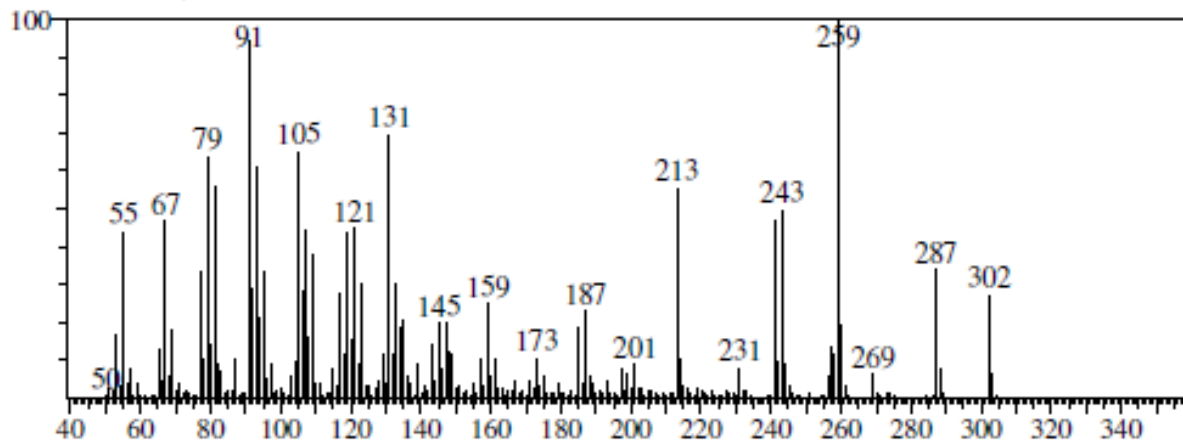

Hit#: 1 Entry: 1 Library: MY LIBRARY.lib  
 SI: 94 Formula: C<sub>20</sub>H<sub>30</sub>O<sub>2</sub> CAS: 6730-83-2 MolWeight: 302 RetIndex: 0  
 CompName: Acido Caurenoico

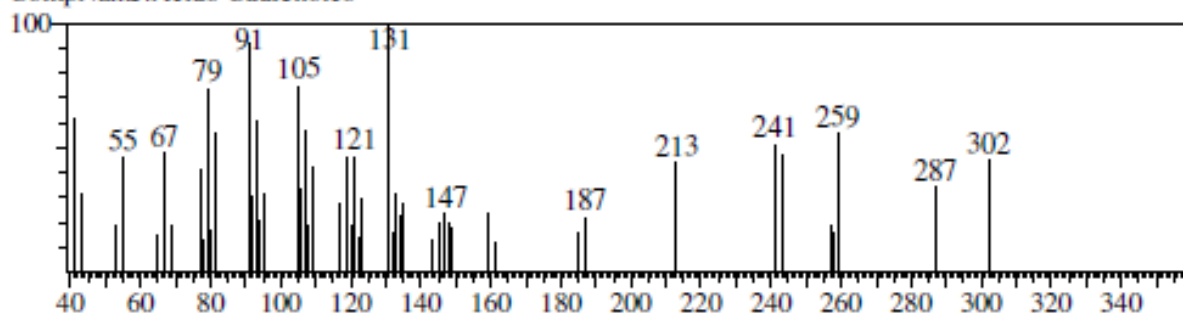

Hit#: 2 Entry: 43171 Library: NIST62.LIB  
 SI: 83 Formula: C<sub>20</sub>H<sub>30</sub>O<sub>2</sub> CAS: 20316-84-1 MolWeight: 302 RetIndex: 0  
 CompName: Kaur-16-en-18-oic acid, (4.beta.)- \$\$ Kaur-16-en-19-oic acid \$\$ Acide kaurenique \$\$ Argyro

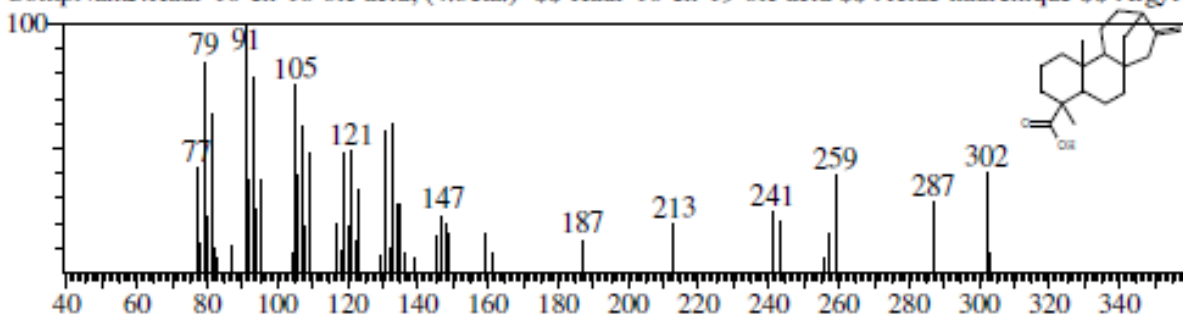

Hit#: 3 Entry: 213488 Library: WILEY7.LIB  
 SI: 83 Formula: C<sub>20</sub>H<sub>30</sub>O<sub>2</sub> CAS: 20316-84-1 MolWeight: 302 RetIndex: 0  
 CompName: Kaur-16-en-18-oic acid, (4.beta.)- (CAS) Kaur-16-en-19-oic acid \$\$ Acide kaurenique \$\$ Ar

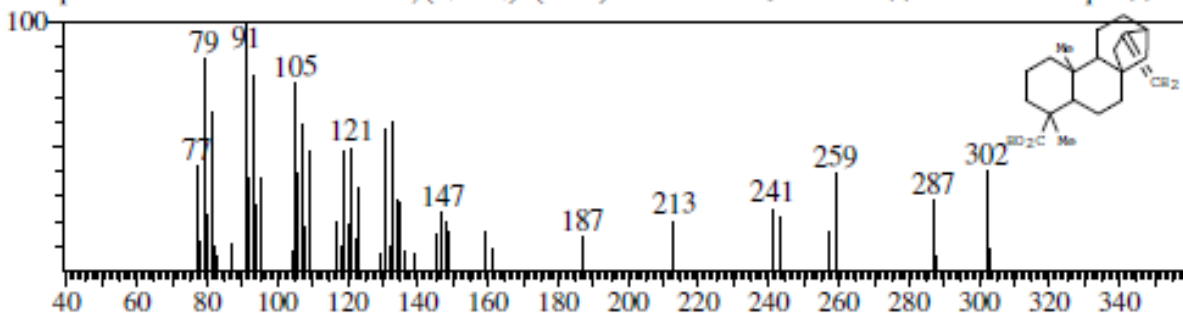

Figure 3. HR-ESI-MS spectrum of compound 1.

## Generic Display Report

Faculdade de Ciencias Farmaceuticas de Ribeirao Preto-USP

## Analysis Info

Analysis Name D:\Data\SILVIA T\croton\_0.d  
Method tune\_low\_Tomaz1200\_POS.m  
Sample Name croton\_0  
Comment

Acquisition Date 6/29/2012 4:31:55 PM  
Operator BDAL@DE  
Instrument micrOTOF-Q II

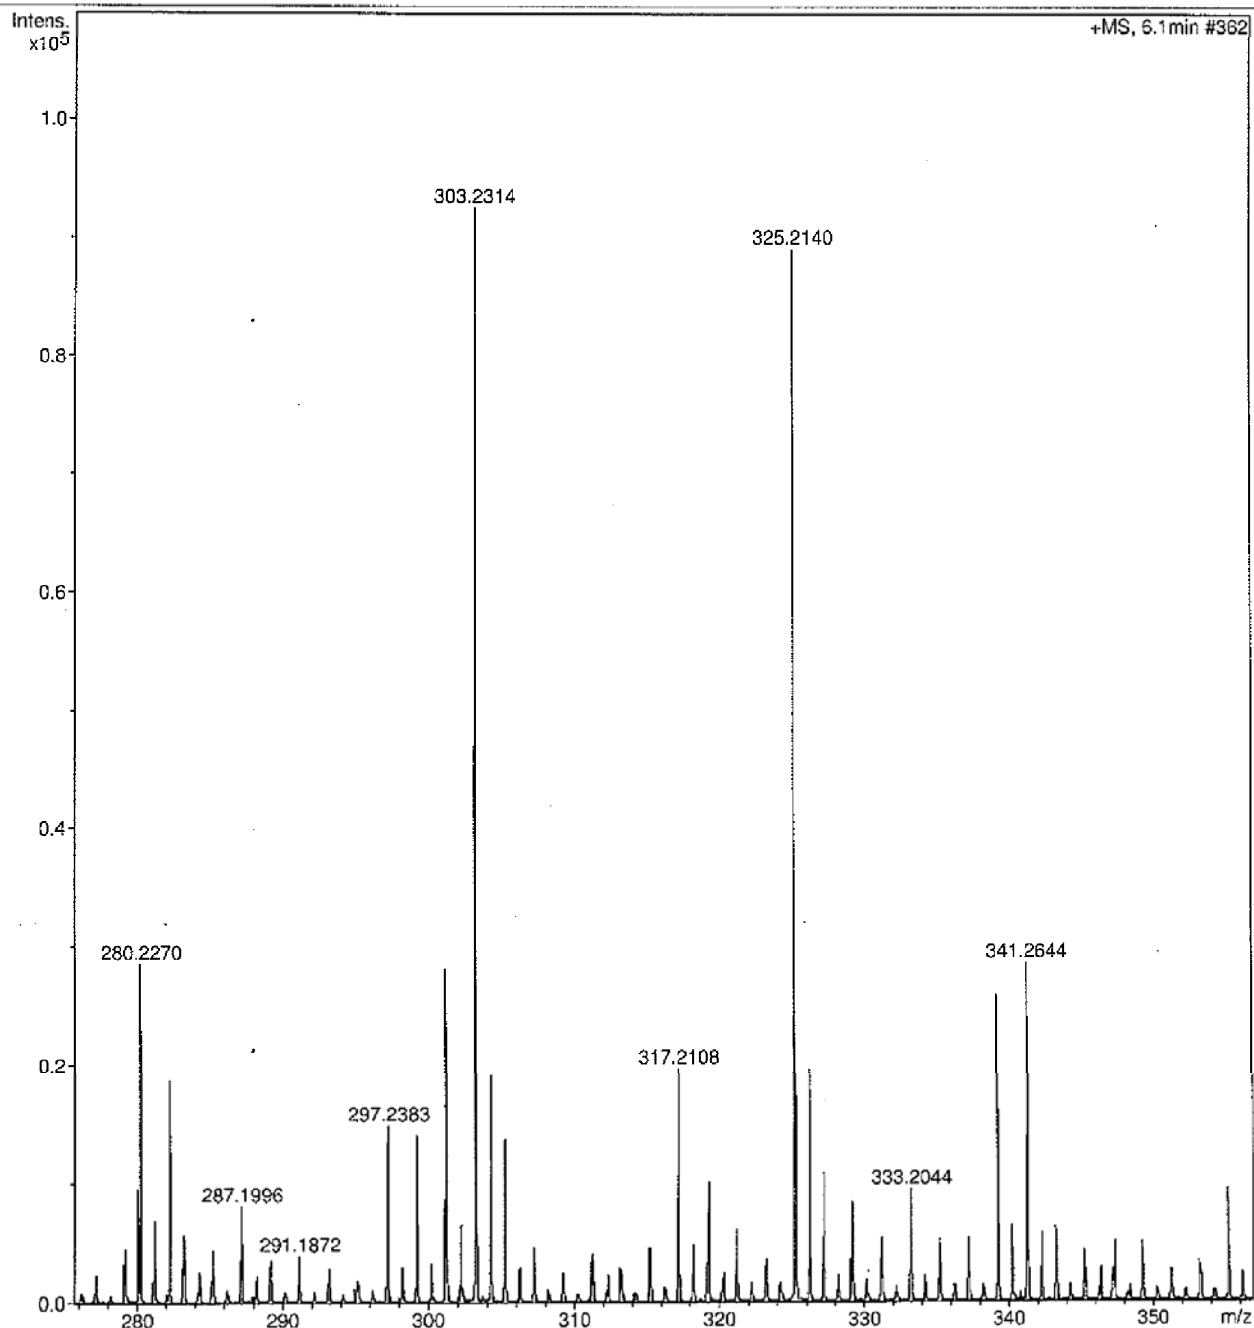

Figure 4. <sup>1</sup>H-NMR spectrum of compound 1.

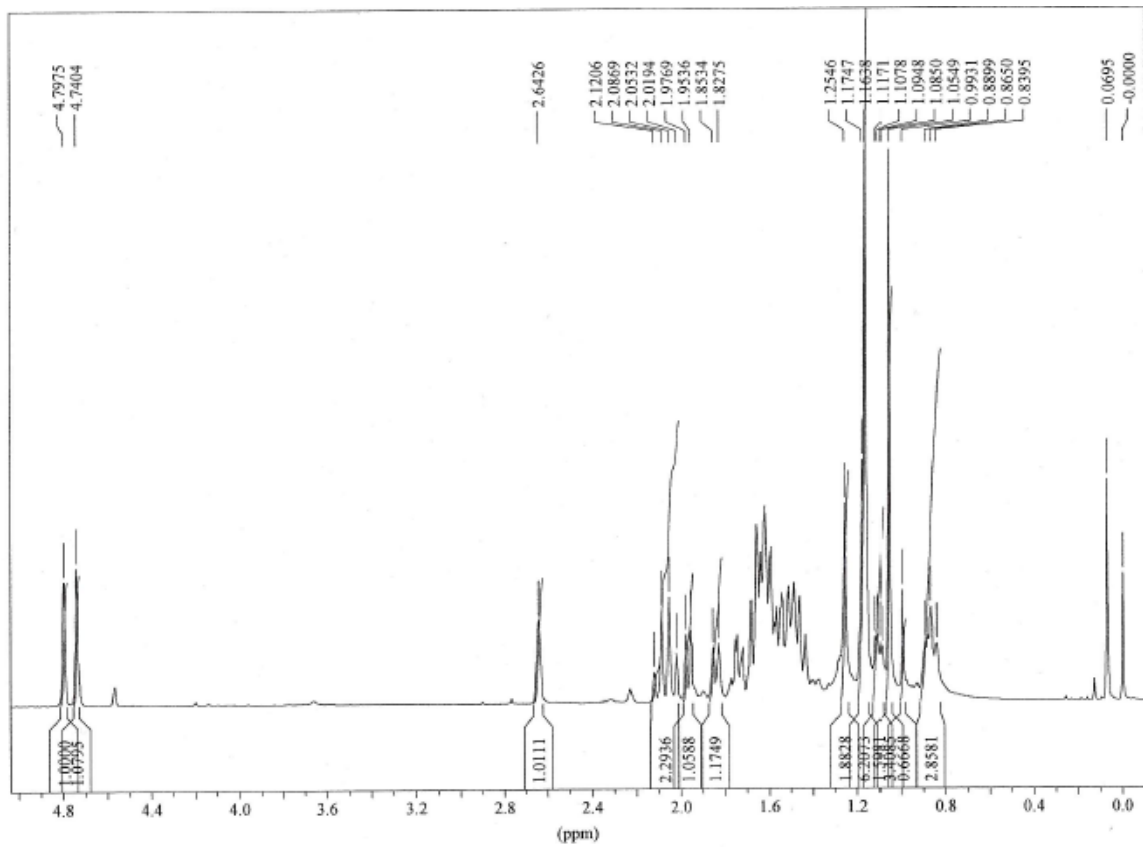

Figure 5. Expansion of <sup>1</sup>H-NMR spectrum of compound 1.

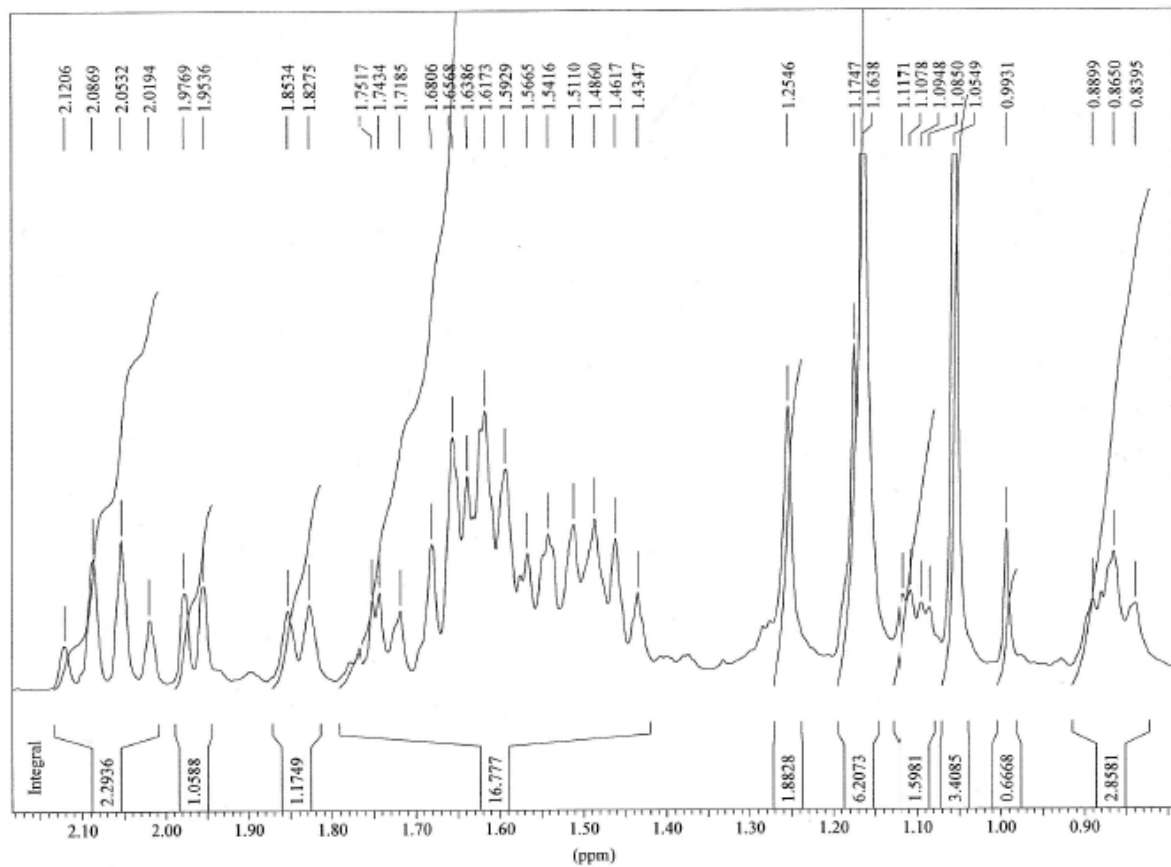

Figure 6.  $^{13}\text{C}$ -NMR spectrum of compound 1.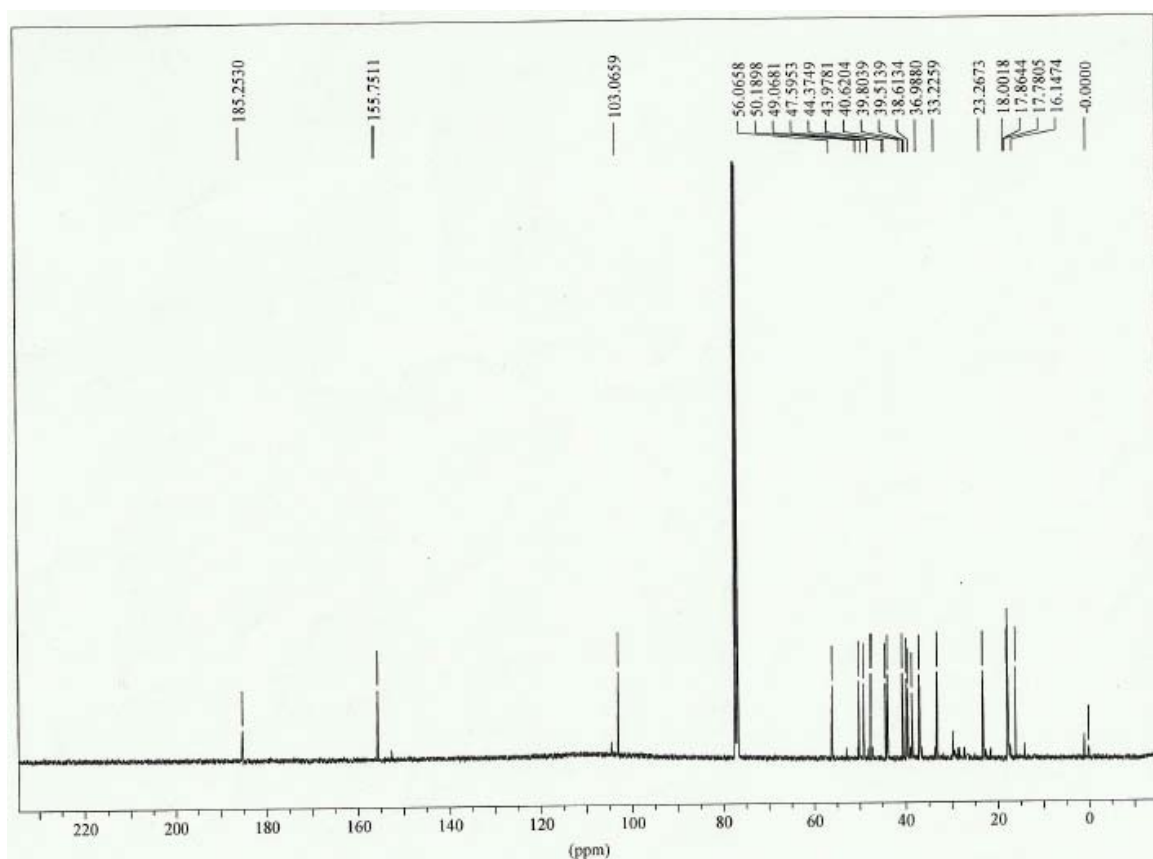Figure 7. Expansion of  $^{13}\text{C}$ -NMR spectrum of compound 1.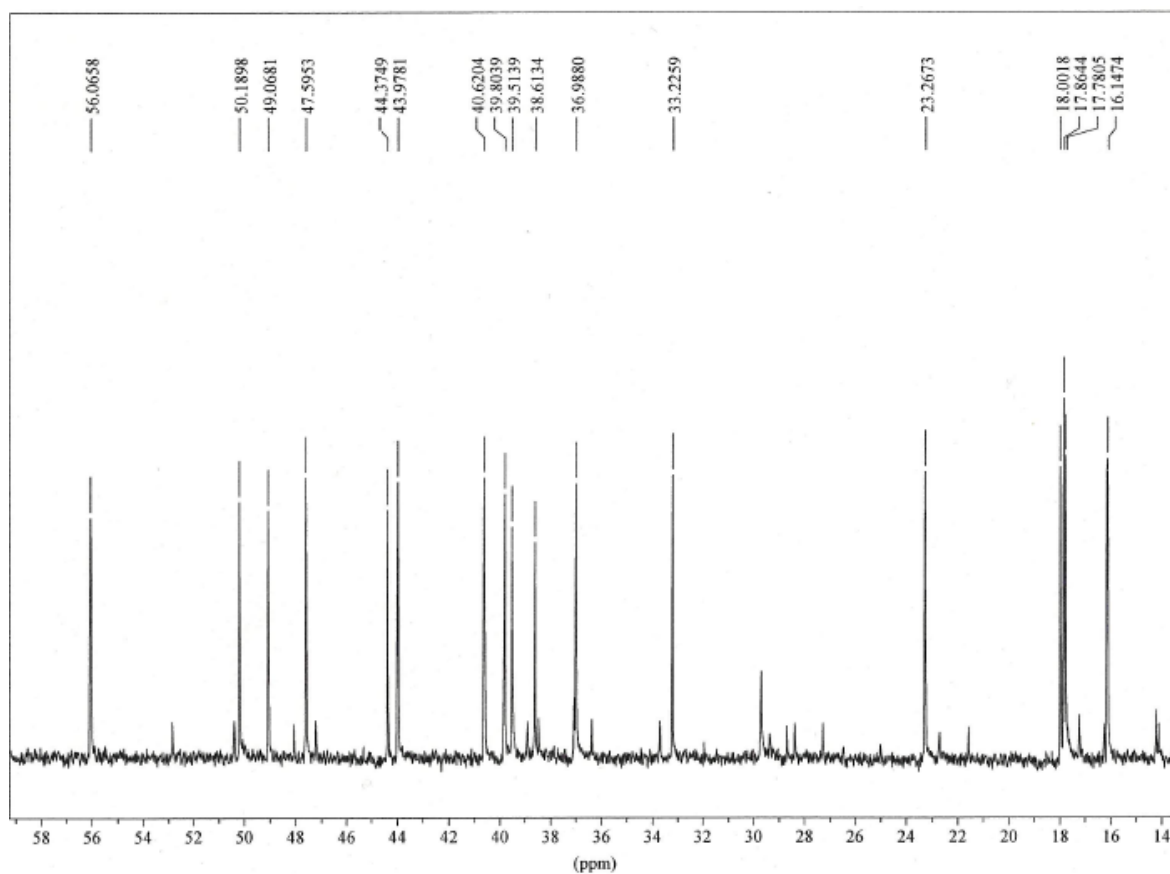

**Figure 8.** DEPT-135 spectrum of compound 1.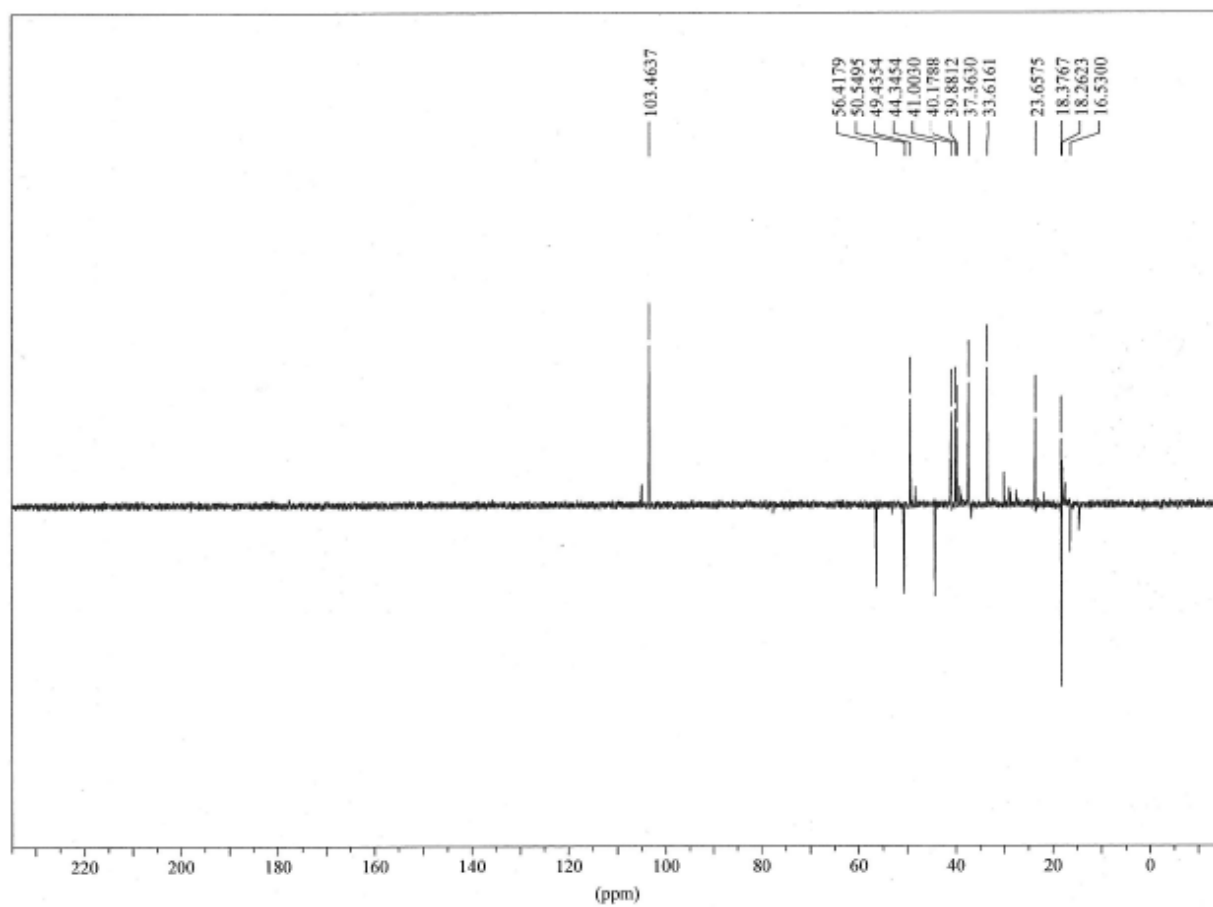**Figure 9.** 2D HMQC spectrum of compound 1.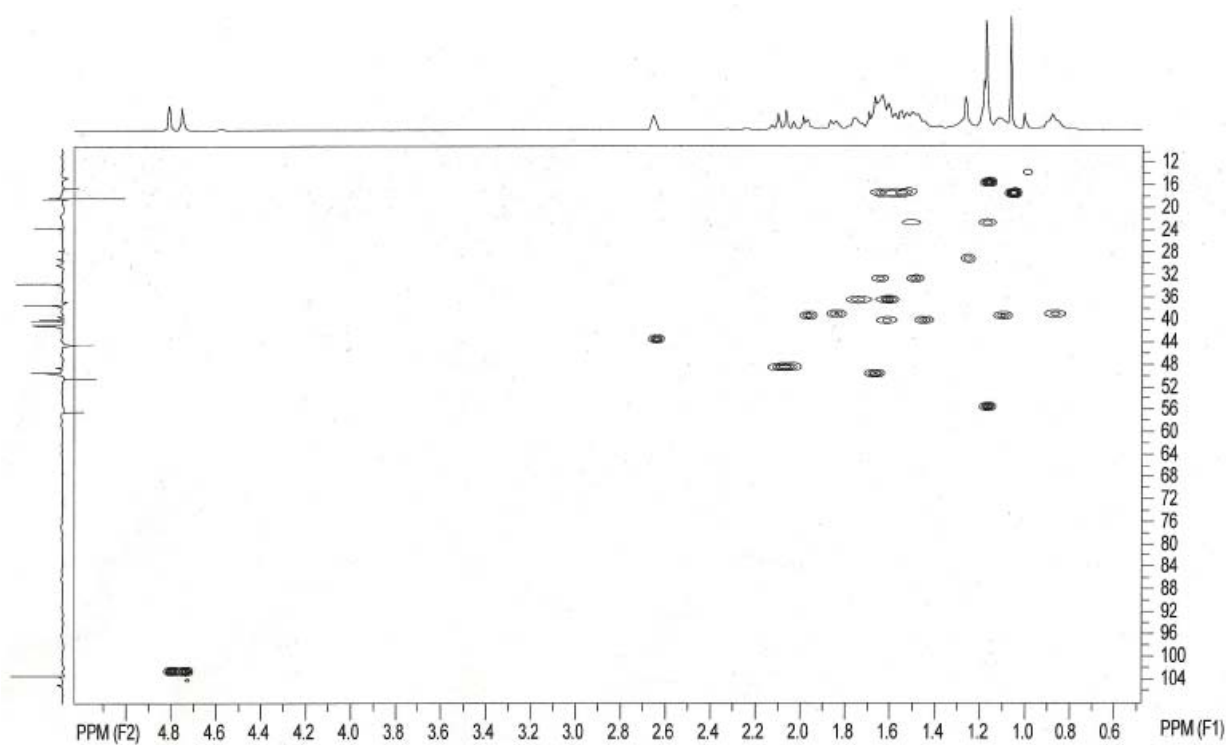

**Figure 10.** Expansion of 2D HMQC spectrum of compound 1.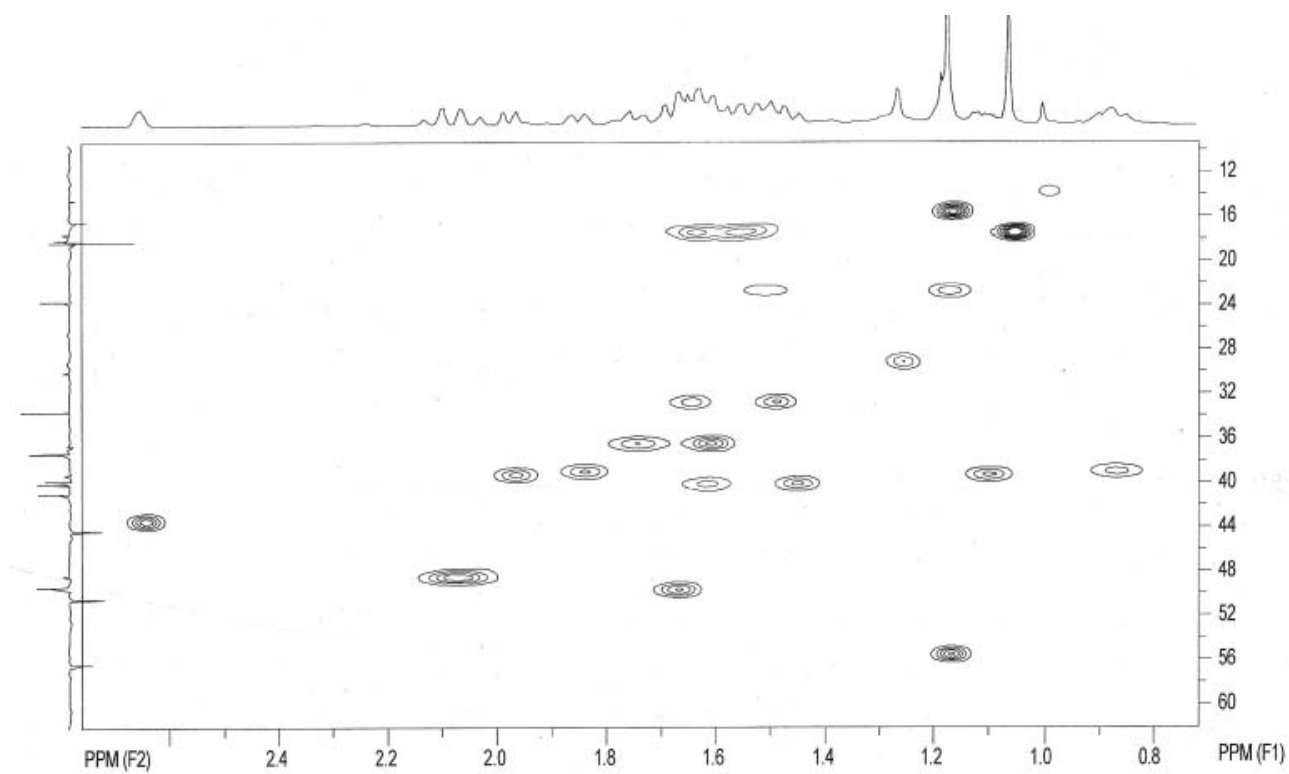**Figure 11.** 2D HMBC spectrum of compound 1.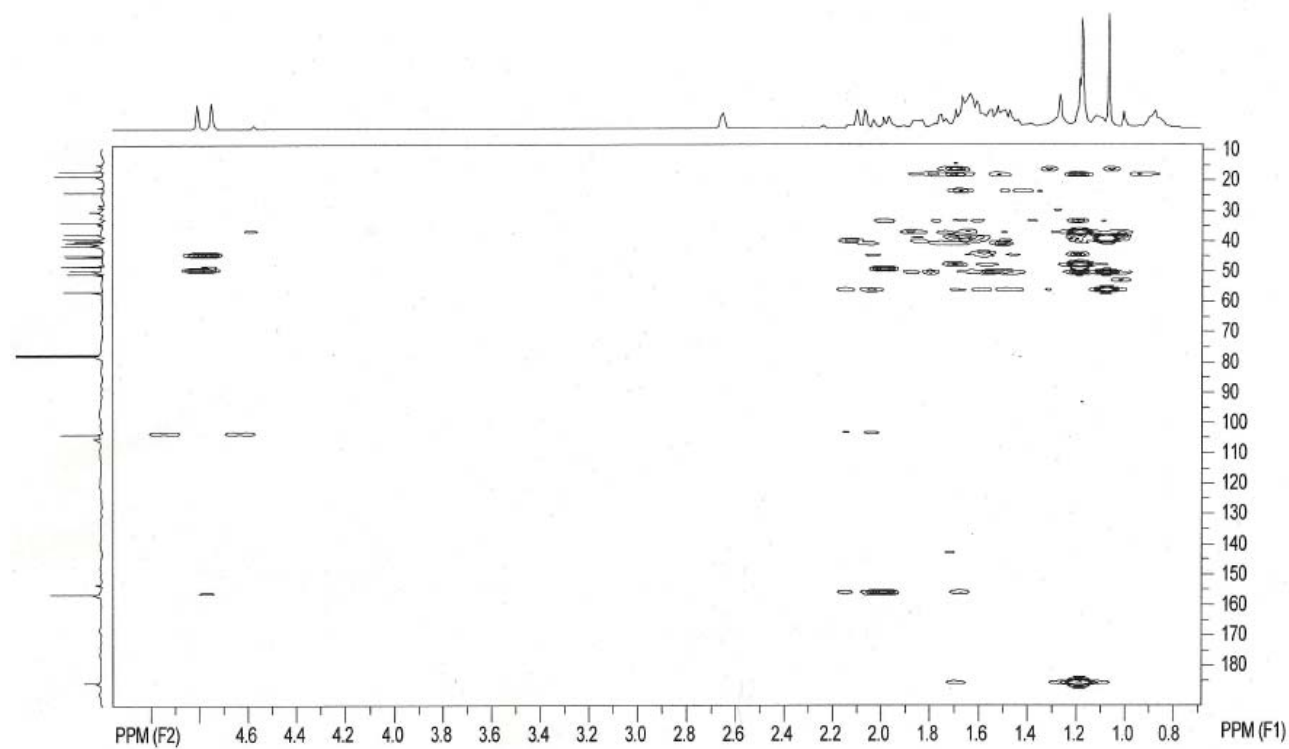

Figure 12. Expansion of 2D HMBC spectrum of compound 1.

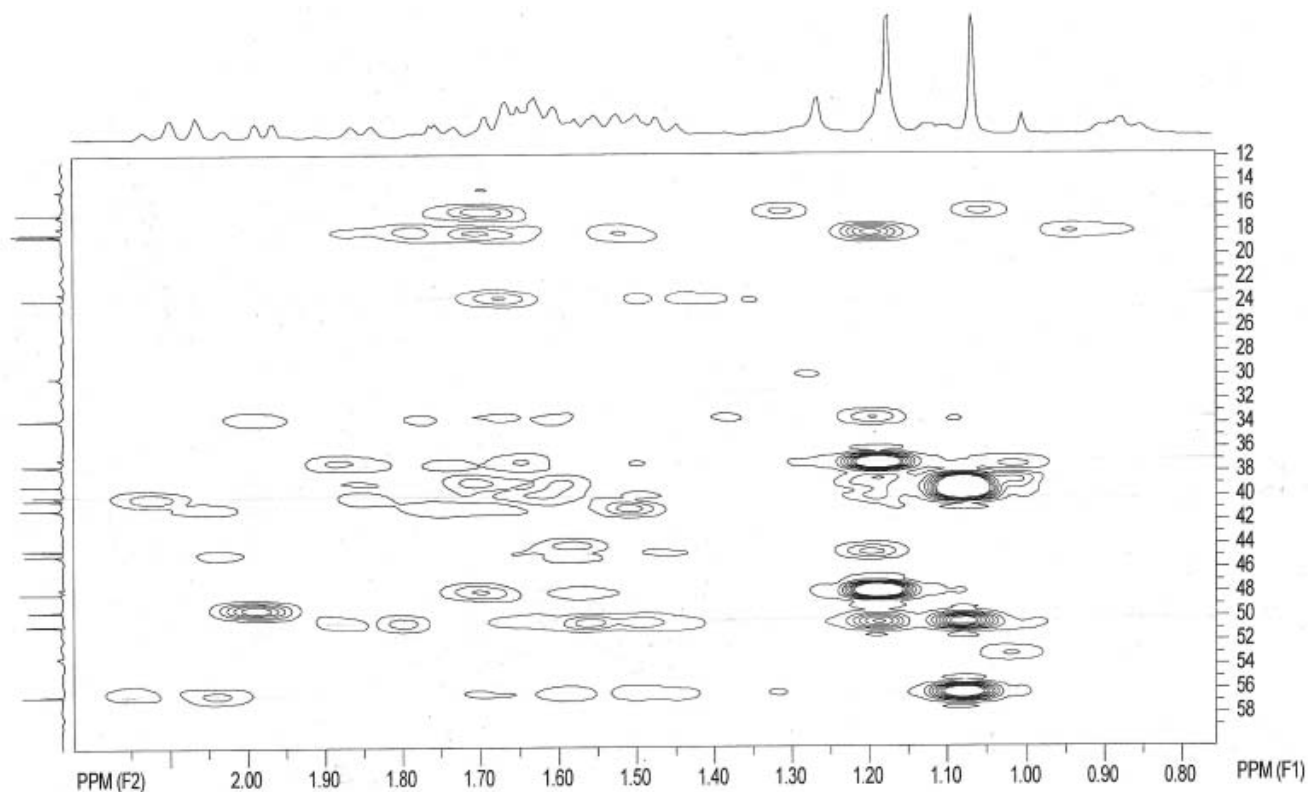

Figure 13. NOEDIFF spectrum of compound 1.

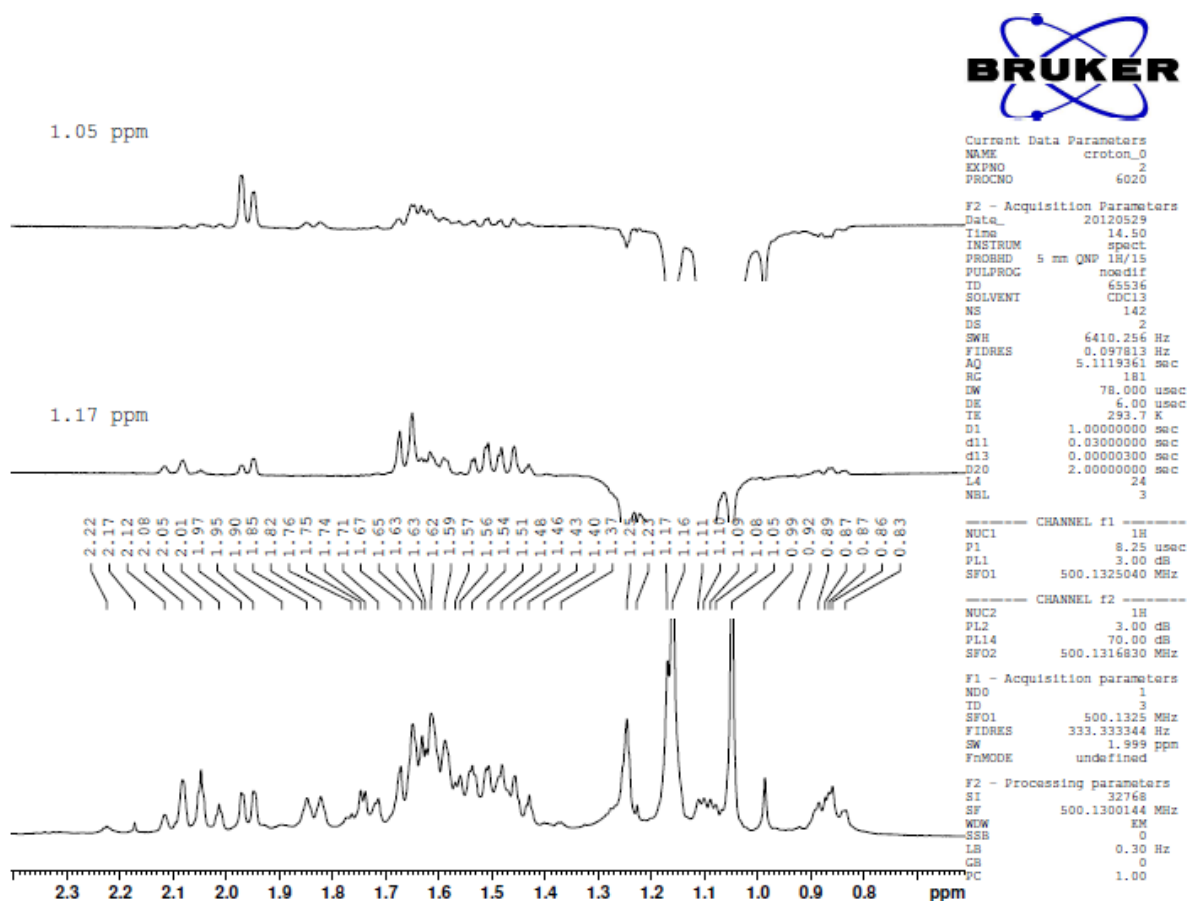



Figure 14. Expansion of NOESY spectrum of compound 1.

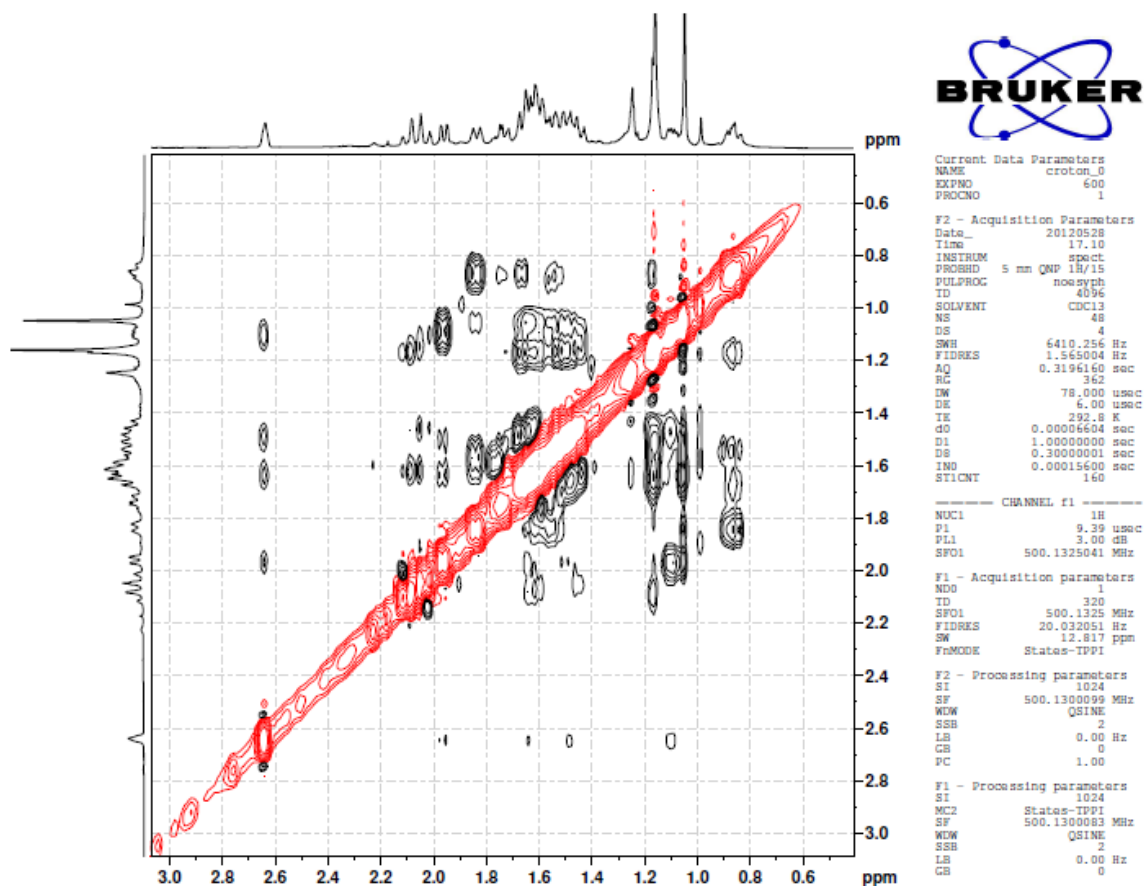

Figure 15. Expansion of NOESY spectrum of compound 1.

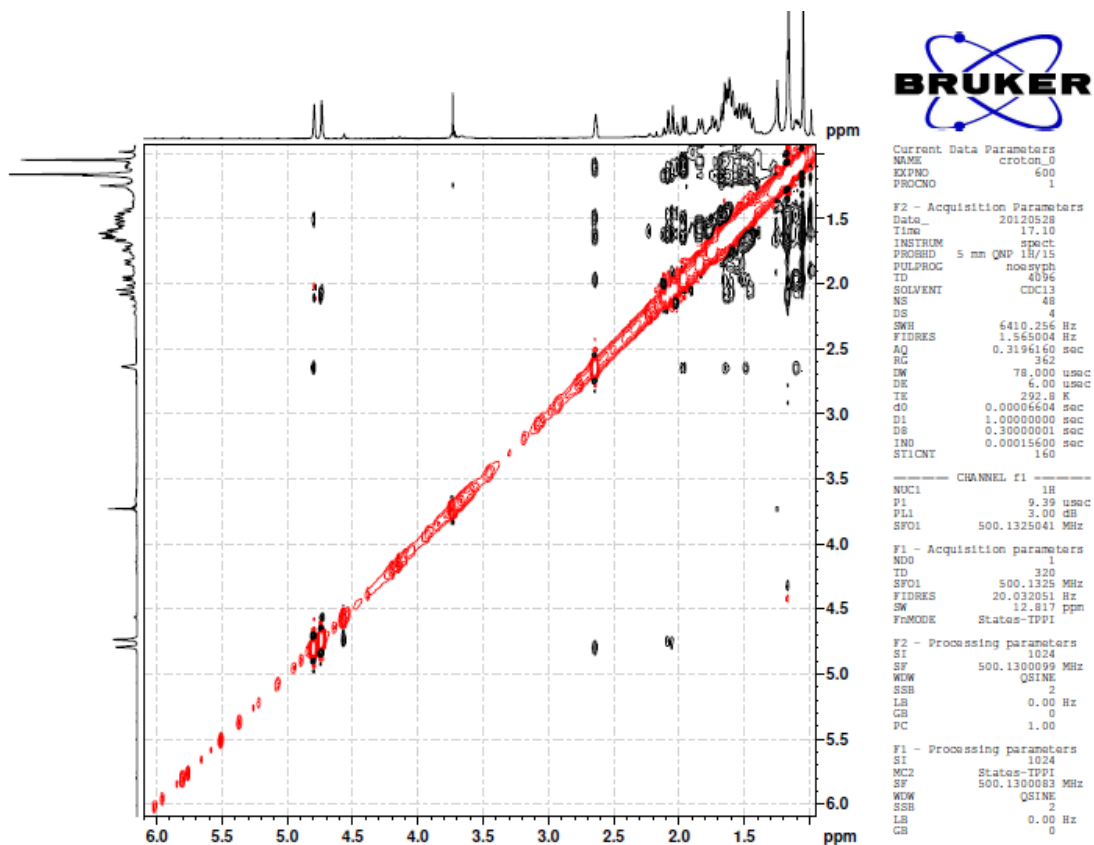

Figure 16. NOESY spectrum of compound 1.

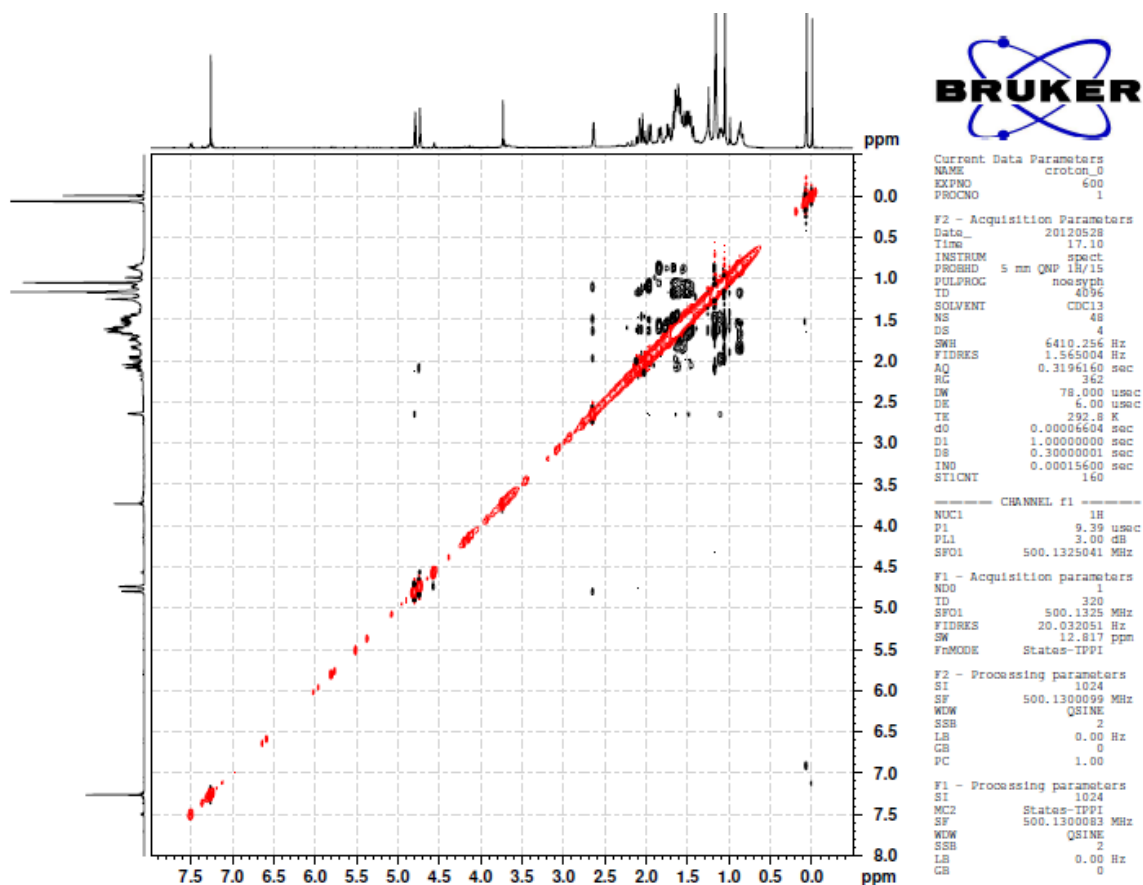

Figure 17. Rows of two-dimensional NOESY spectra of compound 1.

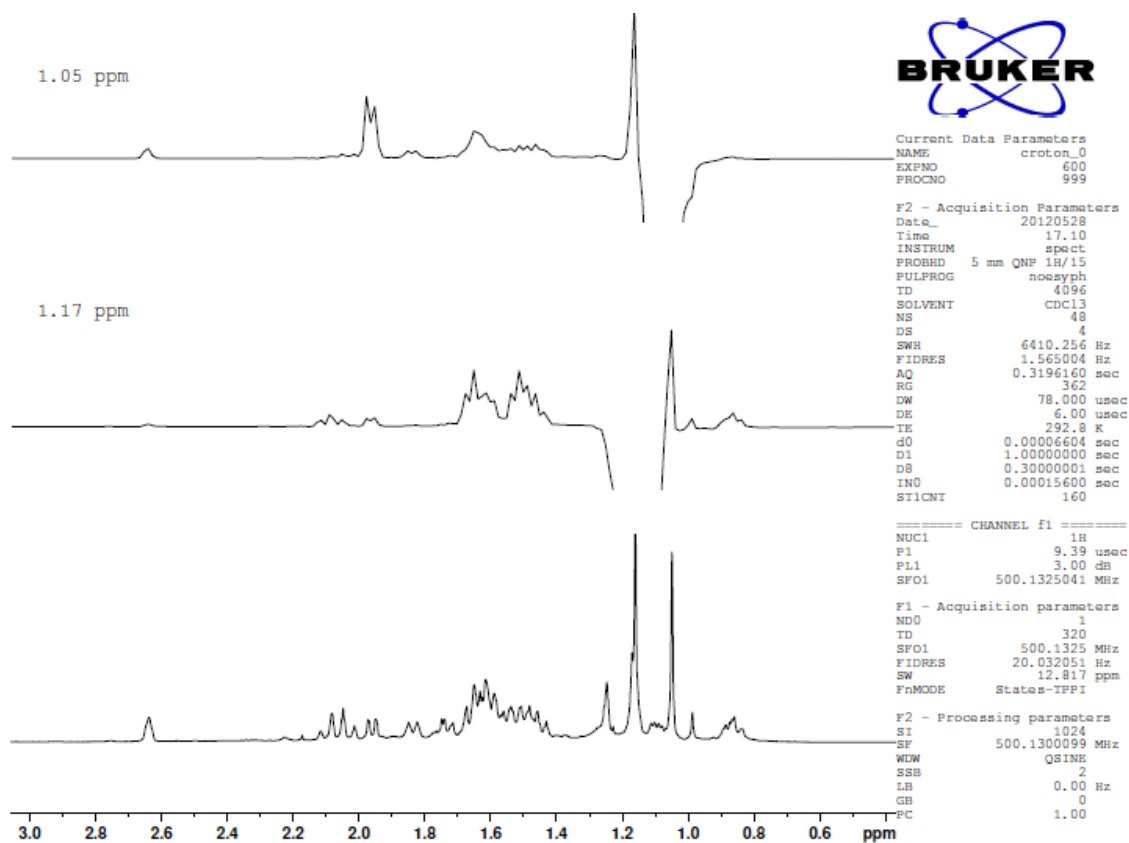

Supplement: s1 [file s1]
